# Supplementary material
Source: Springer Nature journal article supplement (https://www.springermedizin.de/resource/supplementary/12936_2014_3221_MOESM3_ESM.pdf/9545322)
Supplement: MOESM3 [file 9545322]

Plasmodium falciparum isolate SF4 18S ribosomal RNA gene, partial sequence

Sequence ID: [gb|JQ627152.1](#) Length: 1921 Number of Matches: 1

Range 1: 1063 to 1126 [GenBank](#) [Graphics](#)

▼ Next Match ▲ Previous Match

| Score         | Expect                                                        | Identities  | Gaps     | Strand    |
|---------------|---------------------------------------------------------------|-------------|----------|-----------|
| 116 bits(128) | 5e-26                                                         | 64/64(100%) | 0/64(0%) | Plus/Plus |
| Query 4       | CCGACTAGGTGTTGGATGAAAGTGTAAAAATAAAAAGTCATCTTTTCGAGGTGACTTTTAG | 63          |          |           |
| Sbjct 1063    | CCGACTAGGTGTTGGATGAAAGTGTAAAAATAAAAAGTCATCTTTTCGAGGTGACTTTTAG | 1122        |          |           |
| Query 64      | ATTG 67                                                       |             |          |           |
| Sbjct 1123    | ATTG 1126                                                     |             |          |           |

Plasmodium vivax isolate SV6 18S ribosomal RNA gene, partial sequence

Sequence ID: [gb|JQ627158.1](#) Length: 1965 Number of Matches: 1

Range 1: 1057 to 1122 [GenBank](#) [Graphics](#)

▼ Next Match ▲ Previous Match

| Score         | Expect                                                        | Identities | Gaps     | Strand    |
|---------------|---------------------------------------------------------------|------------|----------|-----------|
| 113 bits(124) | 6e-25                                                         | 64/66(97%) | 0/66(0%) | Plus/Plus |
| Query 1       | TGCCGACTAGGCTTTGGATGAAAGATTTTAAAAATAAGARTTTTCTCTTCGGAGTTTATTC | 60         |          |           |
| Sbjct 1057    | TGCCGACTAGGCTTTGGATGAAAGATTTTAAAAATAAGAATTTTCTCTTCGGAGTTTATTC | 1116       |          |           |
| Query 61      | CTAGAT 66                                                     |            |          |           |
| Sbjct 1117    | TTAGAT 1122                                                   |            |          |           |

Plasmodium cf. malariae type 2 small subunit ribosomal RNA gene, complete sequence

Sequence ID: [gb|AF488000.1](#) Length: 2156 Number of Matches: 2

Range 1: 1139 to 1215 [GenBank](#) [Graphics](#)

▼ Next Match ▲ Previous Match

| Score         | Expect                                                       | Identities  | Gaps     | Strand    |
|---------------|--------------------------------------------------------------|-------------|----------|-----------|
| 140 bits(154) | 6e-33                                                        | 77/77(100%) | 0/77(0%) | Plus/Plus |
| Query 4       | CCGACTAGGTGTTGGATGATAGAGTAAAAATAAAAAGAGACATTCATATATATGAGTGTT | 63          |          |           |
| Sbjct 1139    | CCGACTAGGTGTTGGATGATAGAGTAAAAATAAAAAGAGACATTCATATATATGAGTGTT | 1198        |          |           |
| Query 64      | TCITTTAGATAGCTTCC 80                                         |             |          |           |
| Sbjct 1199    | TCITTTAGATAGCTTCC 1215                                       |             |          |           |
